# Supplementary material
Source: publisher figshare collection journal article supplement (https://acs.figshare.com/ndownloader/files/5063140)
Supplement: Supplementary file 1 [file 5063140]

# Ultrafast Charge Separation in a Photo-Reactive Rhenium Appended Porphyrin Assembly Monitored by Picosecond Transient Infrared Spectroscopy

Anders Gabrielsson, František Hartl, Hong Zhang, John R. Lindsay Smith, Michael Towrie, Antonín Vlček, Jr. and Robin N. Perutz\*

**Synthesis of 5-[4-(4-methyl-2,2'-bipyridine-4'-carboxyamidyl)phenyl]-10,15,20-triphenylporphyrinato zinc(II): Bpy-ZnTPP.**

**Table S1.**  $^1\text{H}$  NMR Chemical shifts and assignments for **Bpy-MgTPP** and **Bpy-ZnTPP** in pyridine- $d_5$ .

**Figure S1:**  $^1\text{H}$  NMR spectrum (400 MHz) of  $[\text{Re}(\text{CO})_3(\text{Pic})\text{Bpy-ZnTPP}][\text{OTf}]$  in  $\text{CD}_2\text{Cl}_2$ .

**Figure S2.**  $^1\text{H}$  COSY NMR spectrum of  $[\text{Re}(\text{CO})_3(\text{Pic})\text{Bpy-ZnTPP}][\text{OTf}]$ .

**Figure S3**  $^1\text{H}$  NMR spectrum (500 MHz) of  $[\text{Re}(\text{CO})_3(\text{Pic})\text{Bpy-MgTPP}][\text{OTf}]$  in  $\text{CD}_2\text{Cl}_2$

**Figure S4** Electronic absorption spectra of **Bpy-MgTPP** and  $[\text{Re}(\text{CO})_3(\text{Pic})\text{Bpy-MgTPP}][\text{OTf}]$  in THF.

**Figure S5** UV/vis spectroelectrochemical oxidation of **Bpy-ZnTPP** in THF with electrolyte  $[\text{NBu}_4][\text{PF}_6]$

**Synthesis of 5-[4-(4-methyl-2,2'-bipyridine-4'-carboxyamidy)phenyl]-10,15,20-triphenylporphyrinato zinc(II): Bpy-ZnTPP.** A modification of the method developed by Aspley *et al.*<sup>75,77</sup> was employed for **Bpy-ZnTPP**. **Bpy-H<sub>2</sub>TPP** (0.17, 0.2 mmol) and zinc acetate dihydrate (0.2 g, 0.9 mmol) were heated at reflux in a mixture of trichloromethane (25 cm<sup>3</sup>) and methanol (5 cm<sup>3</sup>) for 1 h. The reaction mixture was cooled, diluted with dichloromethane (100 cm<sup>3</sup>), washed with EDTA solution (2 g in 200 cm<sup>3</sup> 10% sodium carbonate solution), water (3 × 200 cm<sup>3</sup>), dried (MgSO<sub>4</sub>), and the solvent removed. The residue was purified by column chromatography (Si-60, dichloromethane with 2% v/v methanol) to yield **Bpy-ZnTPP** (0.17 g, 0.19 mmol, 96%). The spectroscopic data were in agreement with those reported by Aspley *et al.*<sup>77</sup>

<sup>1</sup>H NMR (500 MHz, THF-*d*<sub>8</sub>): δ 2.61 (3 H, s, Bpy CH<sub>3</sub>); 7.35 (1 H, d, br, 3.8 Hz, Bpy); 7.86-7.89 (9 H, m, *m*-, *p*-phenyl); 8.10 (1H, dd, *J* 4.76 and 1.6 Hz, Bpy); 8.33-8.36 (6 H, m, 6 *o*-phenyl); 8.41 (2 H, d, 8.58 Hz, *m*-bridging phenyl); 8.59 (1 H, s, Bpy); 8.79 (1 H, d, 4.76 Hz, Bpy); 8.97 (4 H, s, β-pyrrolic a and b); 8.99 (3 H, m, 2 β-pyrrolic and 1 Bpy); 9.08 (2 H, d, *J* 4.45 Hz, β-pyrrolic d); 9.25 (1H, s, Bpy); 11.90 (1 H, s, br, CONH).

ESI-MS: *m/z* = 888 (100 % MH<sup>+</sup>)

**Table S2.**  $^1\text{H}$  NMR Chemical shifts and assignments for **Bpy-MgTPP** and **Bpy-ZnTPP** in pyridine- $d_5$ .

| <b>Bpy-MgTPP</b> | <b>Bpy-ZnTPP<sup>a</sup></b> | Assignment                                  |
|------------------|------------------------------|---------------------------------------------|
| 2.15, s          | 2.15, s                      | 3 H, Bpy CH <sub>3</sub>                    |
| 7.02, d          | 7.01, d                      | 1 H, Bpy                                    |
| 7.66, m          | 7.68, m                      | 9 H <i>m</i> -, <i>p</i> -phenyl            |
| 8.14, d          | 8.14, d                      | 1 H, Bpy                                    |
| 8.30, m          | 8.30, s                      | 6 H, <i>o</i> -phenyl                       |
| 8.35, d          | 8.36, d                      | 2 H, bridging C <sub>6</sub> H <sub>4</sub> |
| 8.43, s          | 8.43, s                      | 1 H, Bpy                                    |
| 8.48, d          | 8.50, d                      | 2 H, bridging C <sub>6</sub> H <sub>4</sub> |
| 8.55, d          | 8.54, d                      | 1 H, Bpy                                    |
| 8.87, d          | 8.86, d                      | 1 H, Bpy                                    |
| 9.03, s          | 9.06, s                      | 4 H, $\beta$ -pyrrole a and b               |
| 9.06, d          | 9.09, d                      | 2 H, $\beta$ -pyrrole c                     |
| 9.17, d          | 9.20, d                      | 2 H, $\beta$ -pyrrole c                     |
| 9.48, s          | 9.48, s                      | 1 H, Bpy                                    |
| 11.80, s, br     | 11.86, s                     | 1 H, CONH                                   |

<sup>a</sup> Ref 77

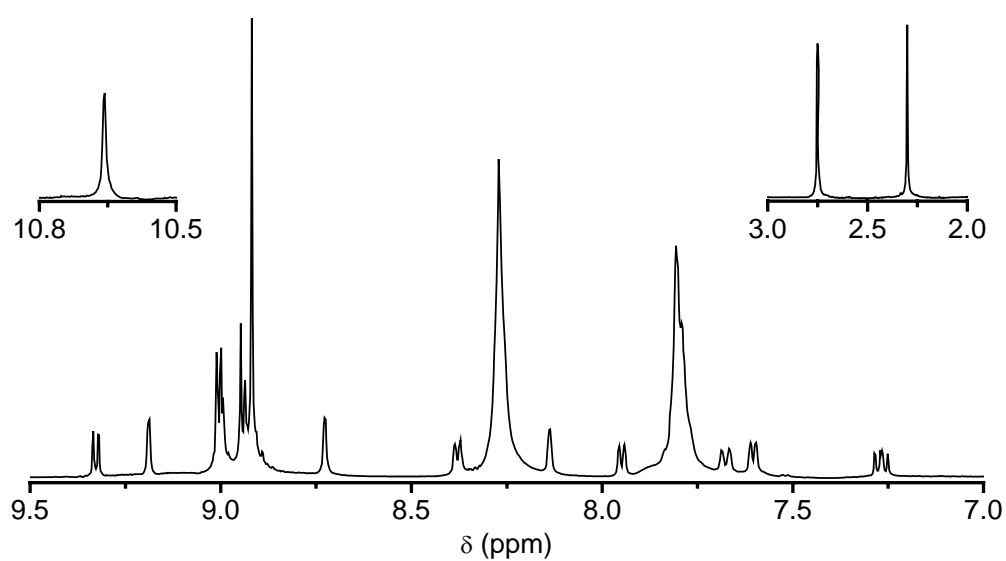

**Figure S1:**  $^1\text{H}$  NMR spectrum (400 MHz) of  $[\text{Re}(\text{CO})_3(\text{Pic})\text{Bpy-ZnTPP}][\text{OTf}]$  in  $\text{CD}_2\text{Cl}_2$ .

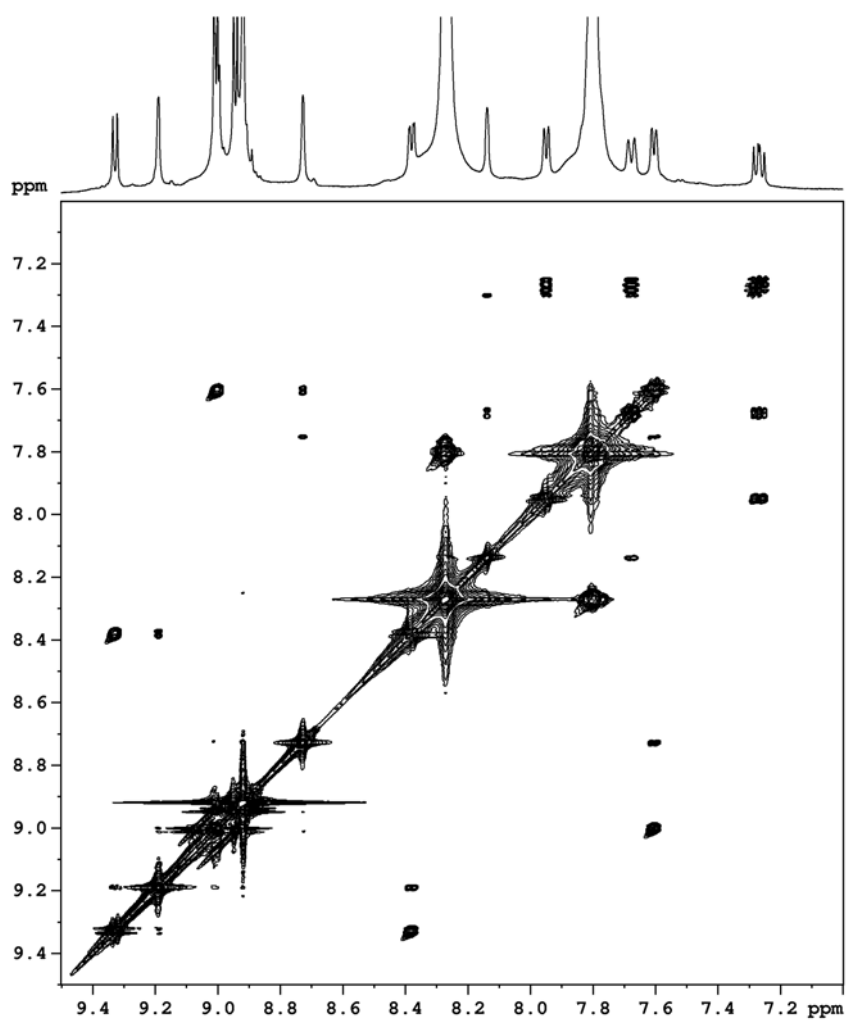

**Figure S2.**  $^1\text{H}$  COSY NMR spectrum of  $[\text{Re}(\text{CO})_3(\text{Pic})\text{Bpy-ZnTPP}][\text{OTf}]$ .

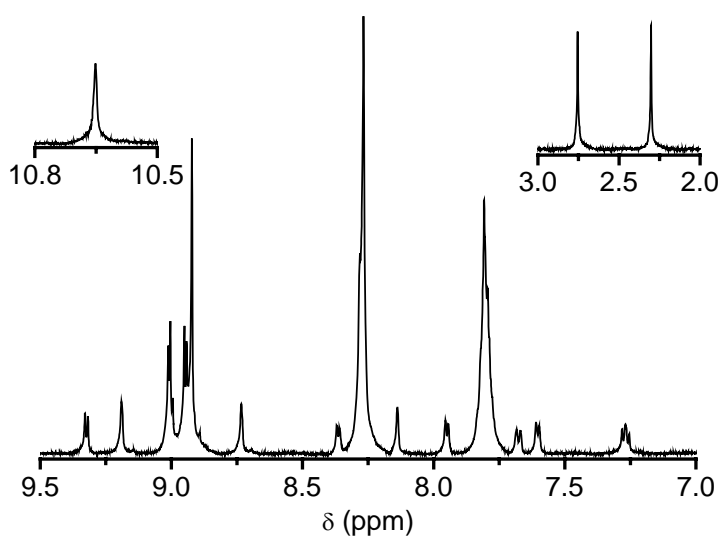

**Figure S3**  $^1\text{H}$  NMR spectrum (500 MHz) of  $[\text{Re}(\text{CO})_3(\text{Pic})\text{Bpy-MgTPP}][\text{OTf}]$  in  $\text{CD}_2\text{Cl}_2$

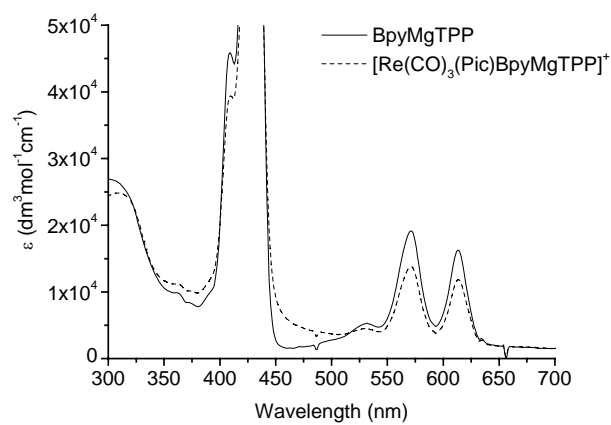

**Figure S4** Electronic absorption spectra of **Bpy-MgTPP** and  $[\text{Re}(\text{CO})_3(\text{Pic})\text{Bpy-MgTPP}][\text{OTf}]$  in THF.

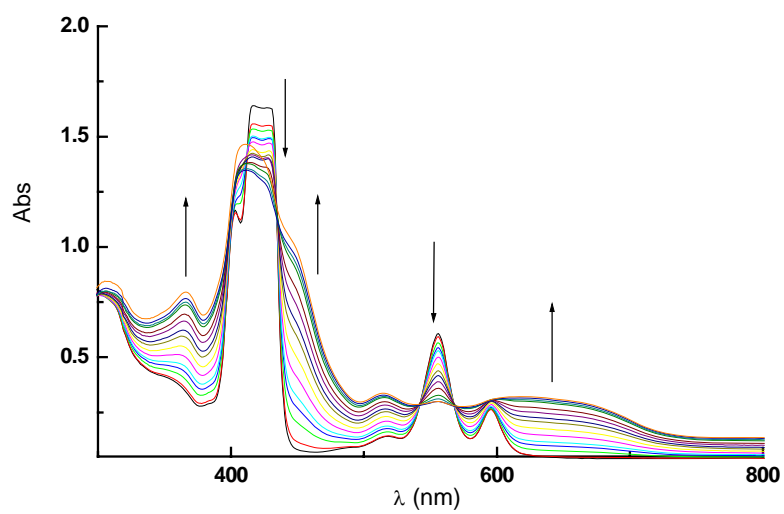

**Figure S5** UV/vis spectroelectrochemical oxidation of **Bpy-ZnTPP** in THF with electrolyte  $[\text{NBu}_4][\text{PF}_6]$
